# Supplementary material
Source: publisher figshare collection journal article supplement (https://gsajournals.figshare.com/ndownloader/files/22463840)
Supplement: Supplementary file 1 [file 22463840]

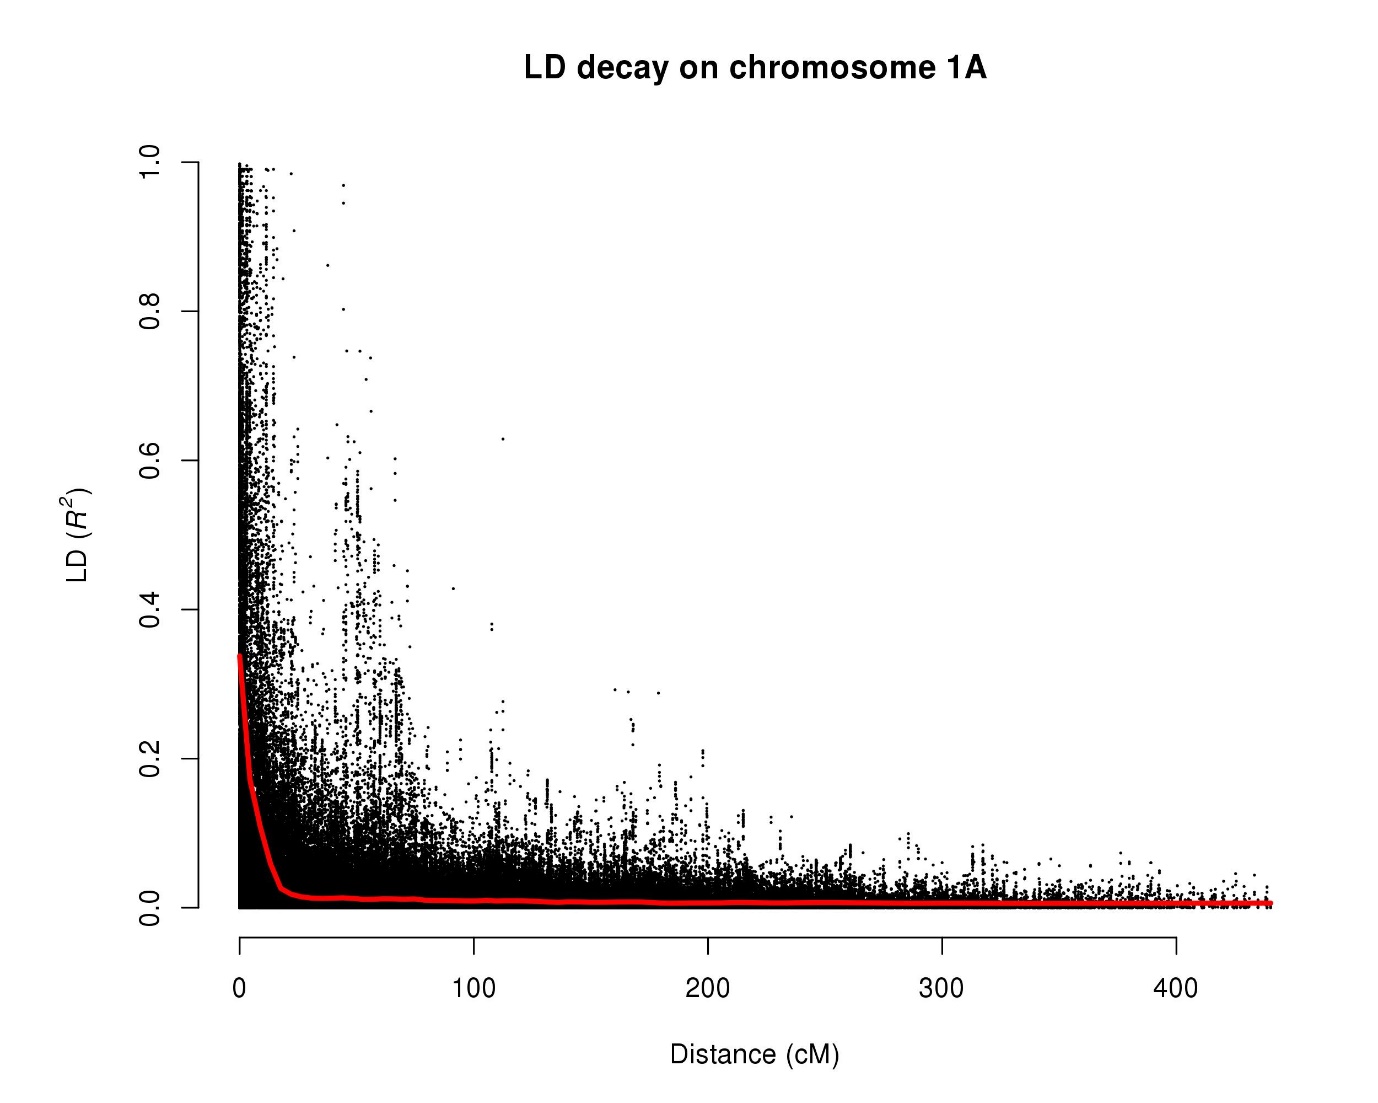


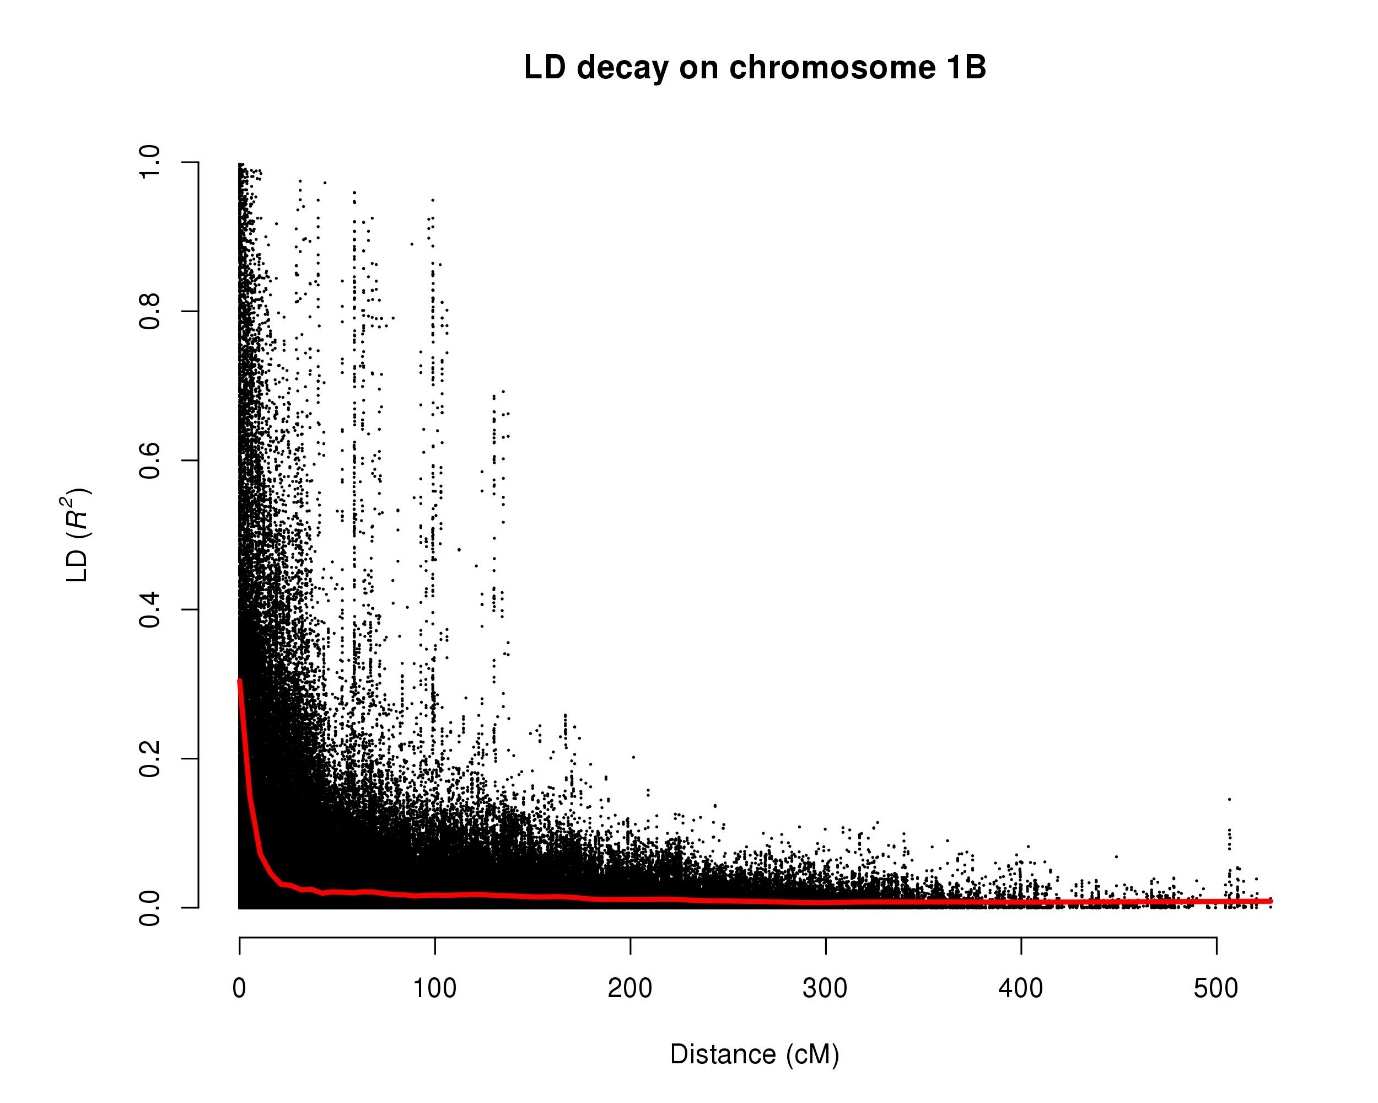


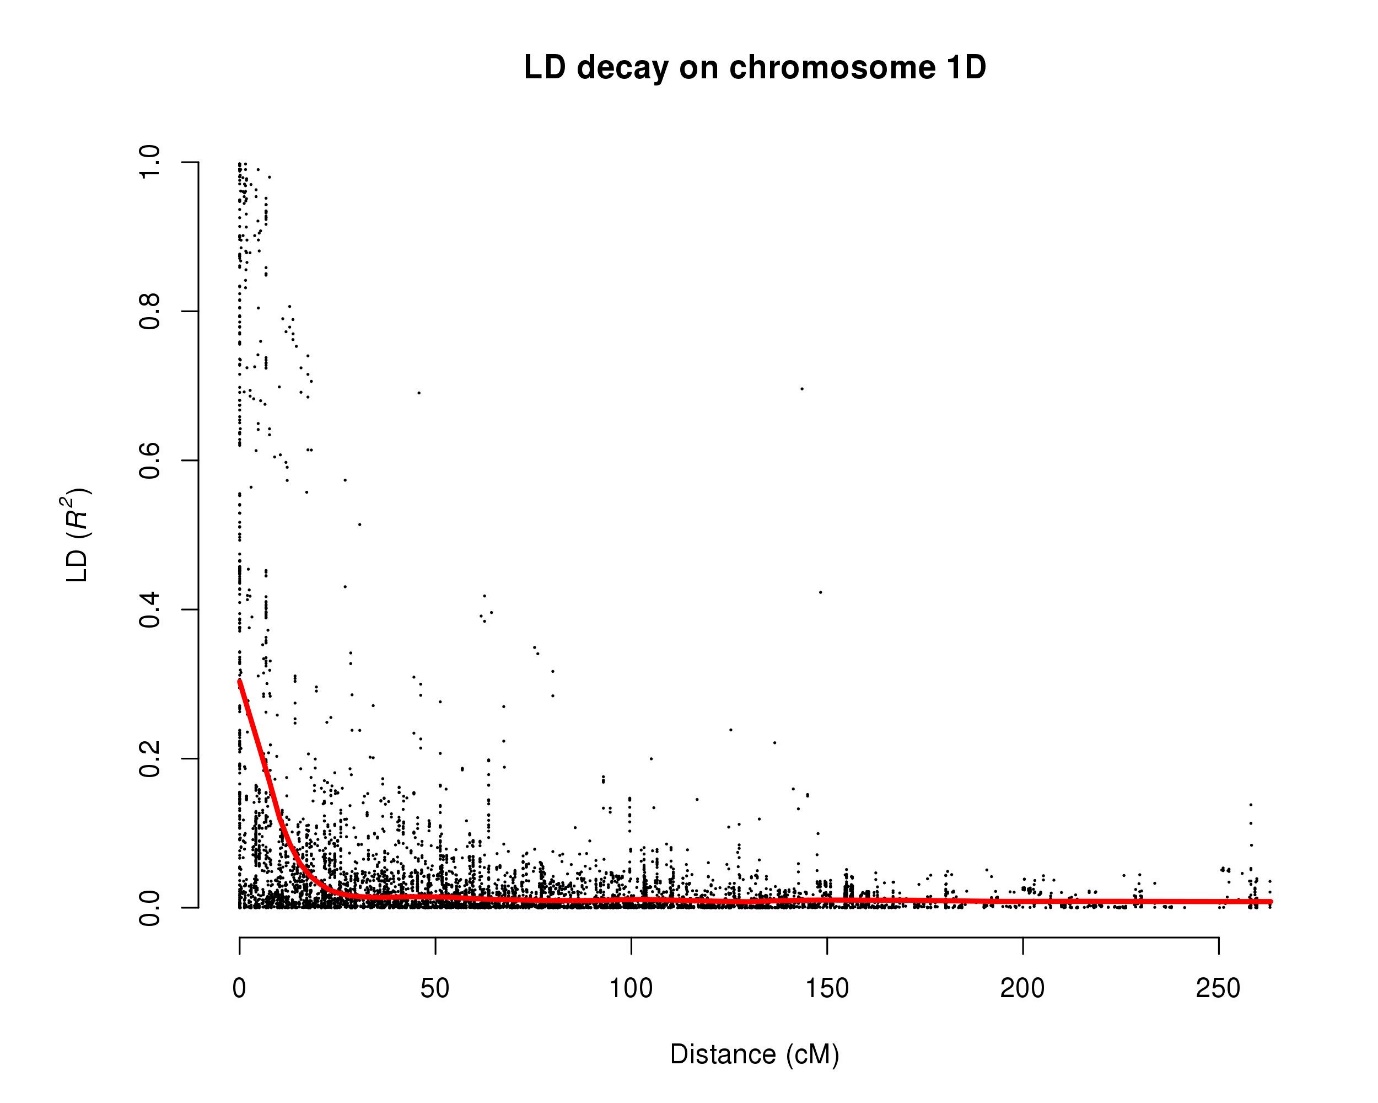


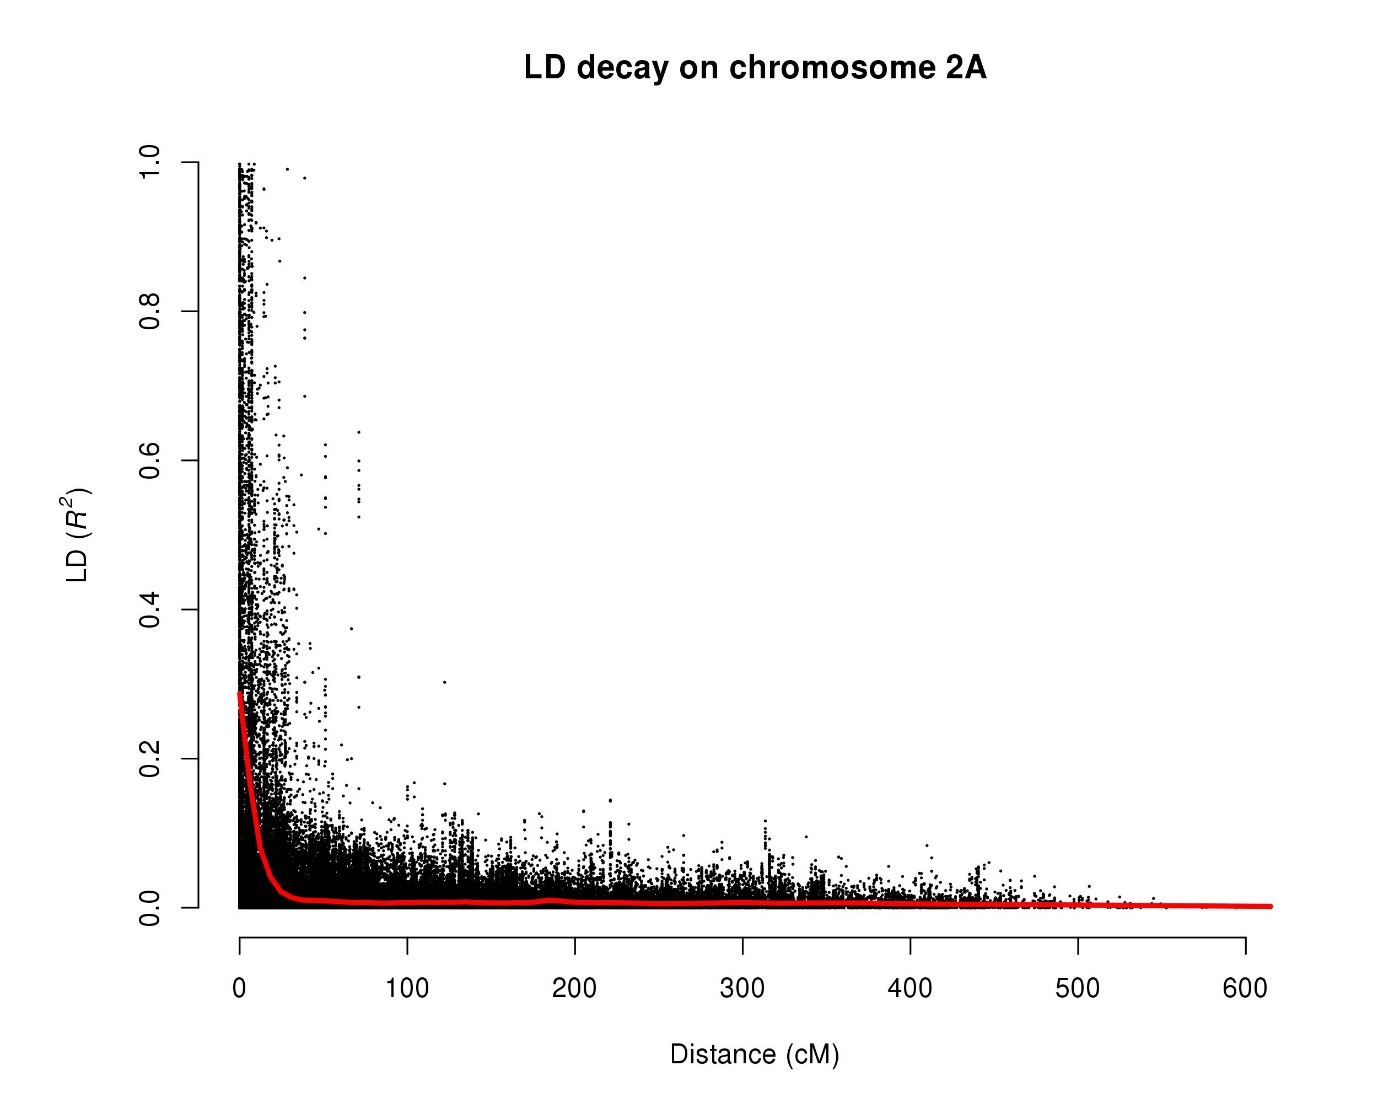


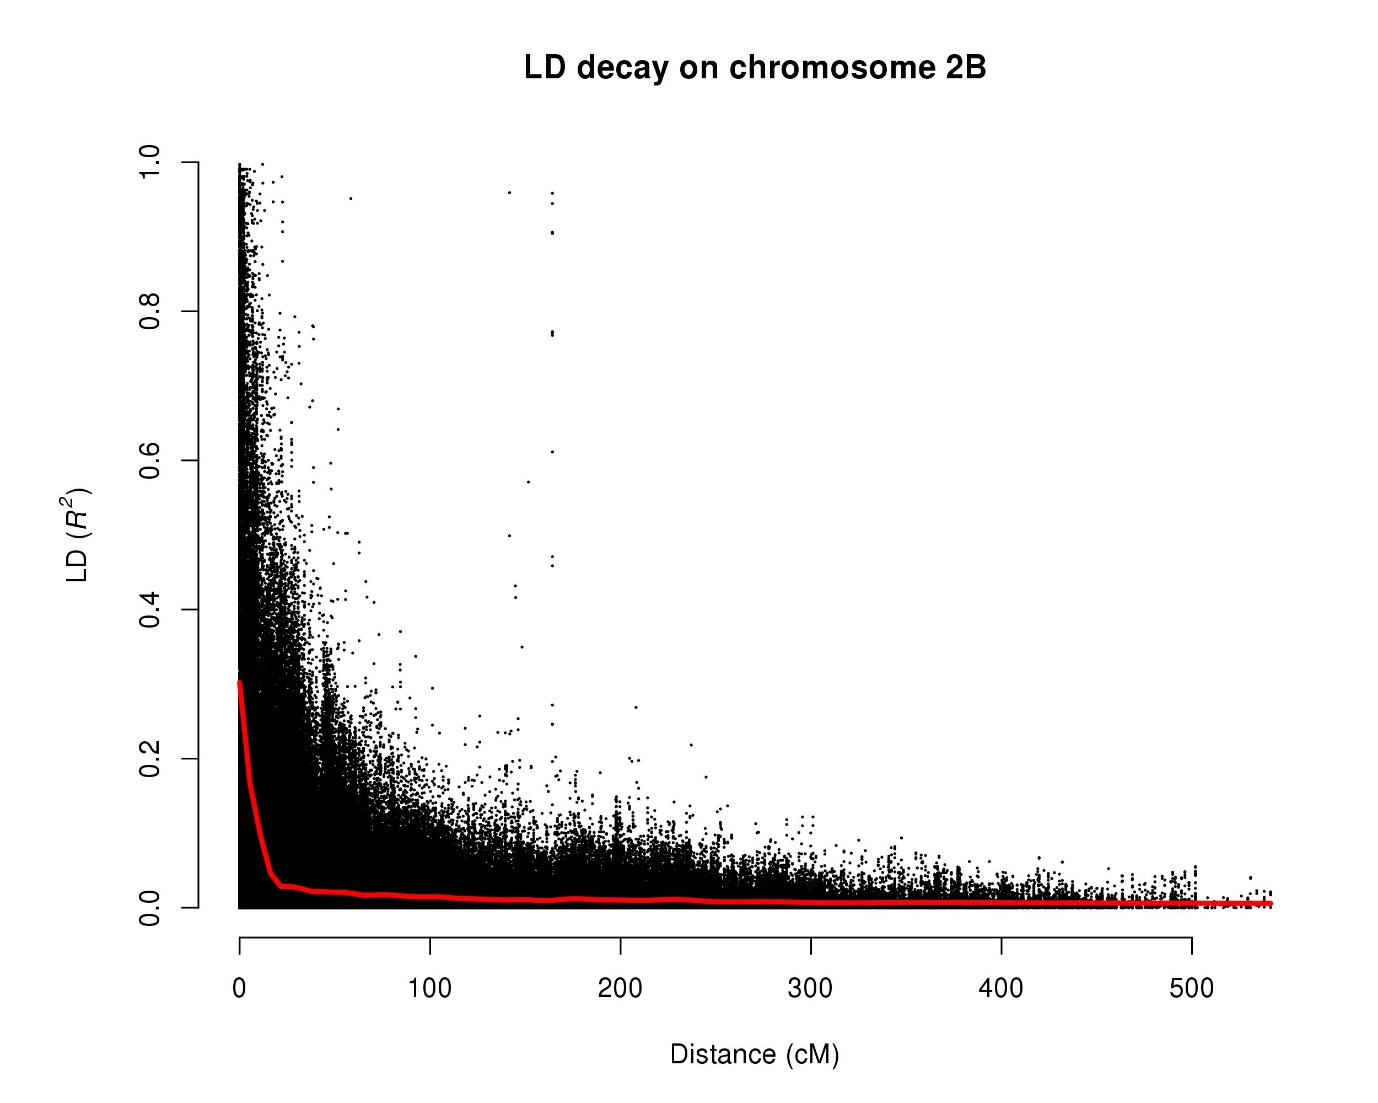


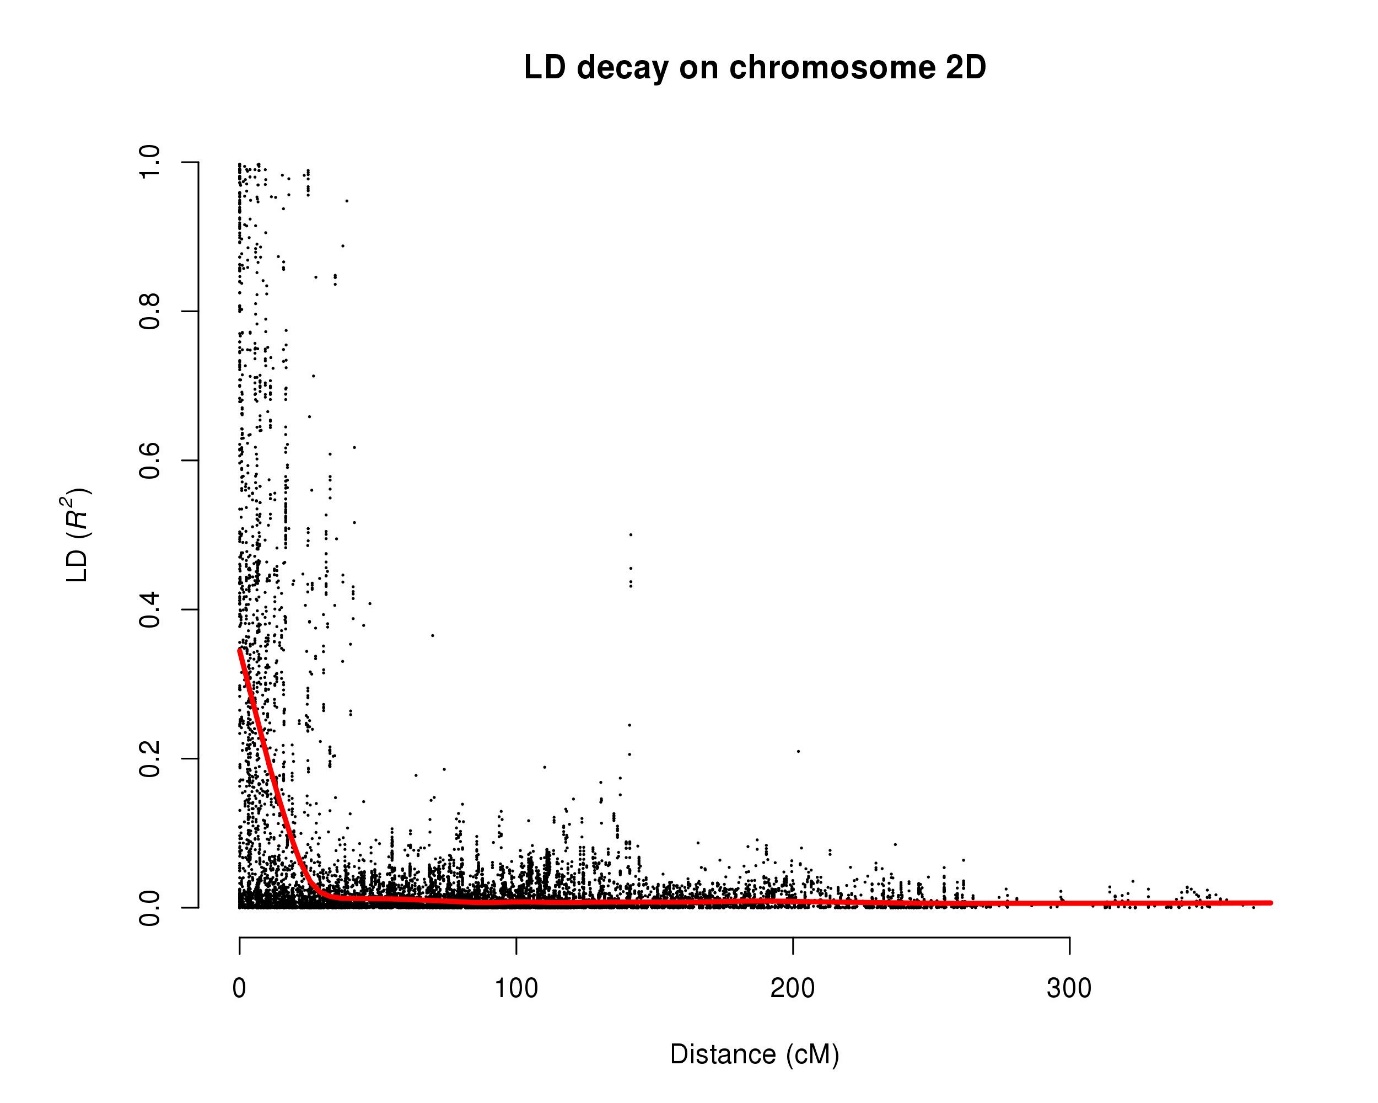


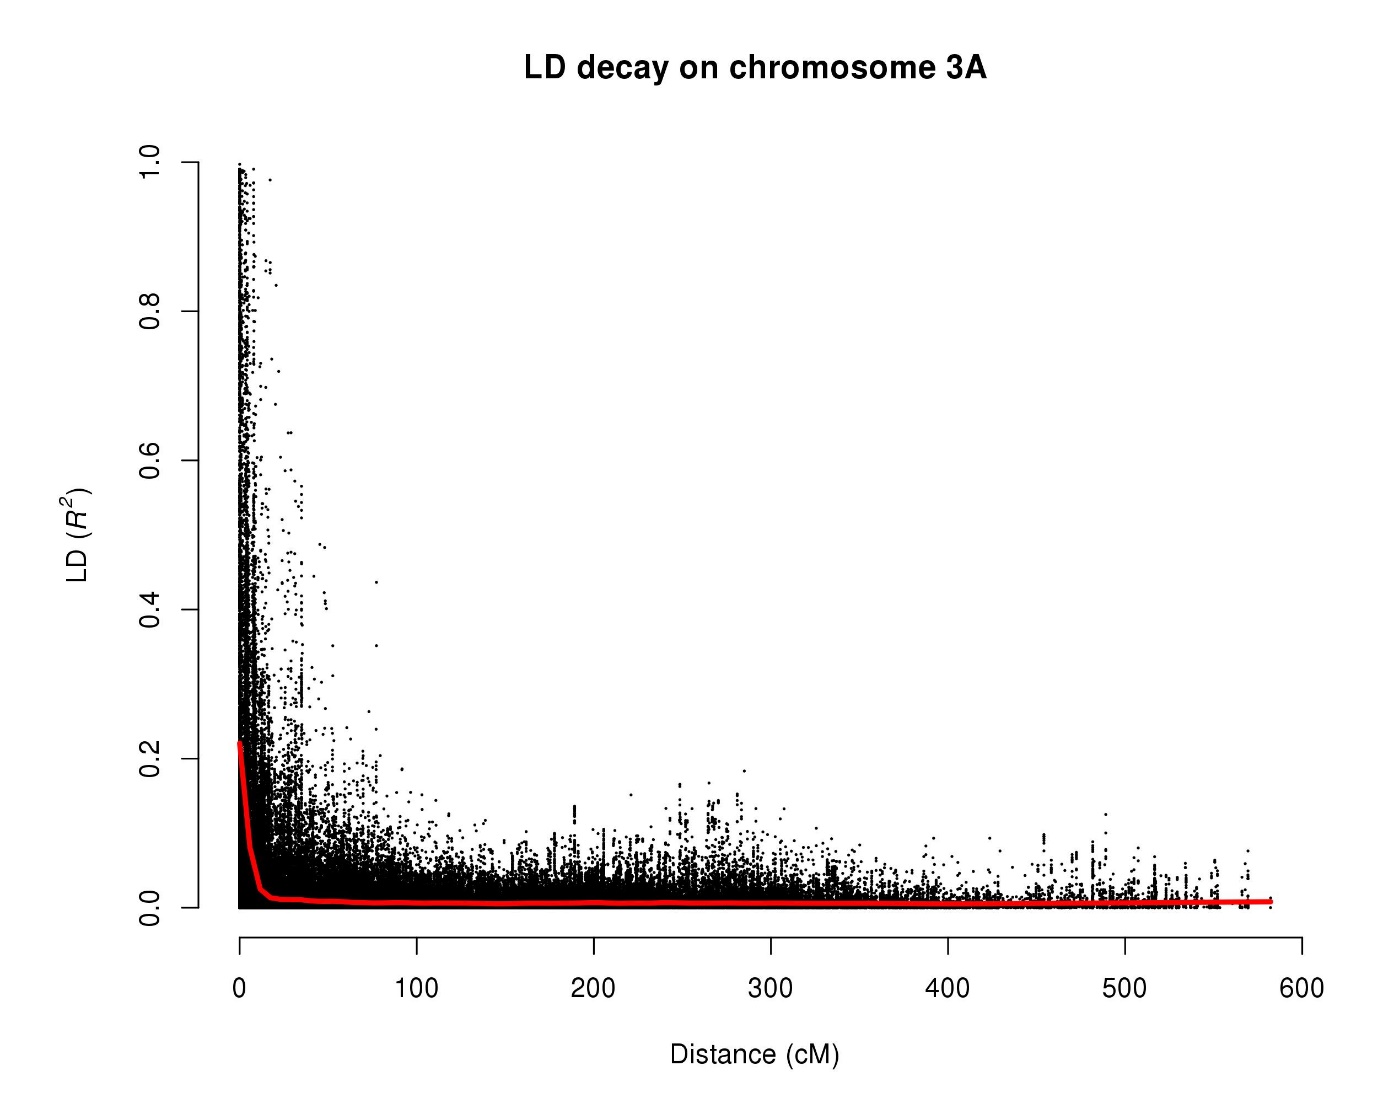


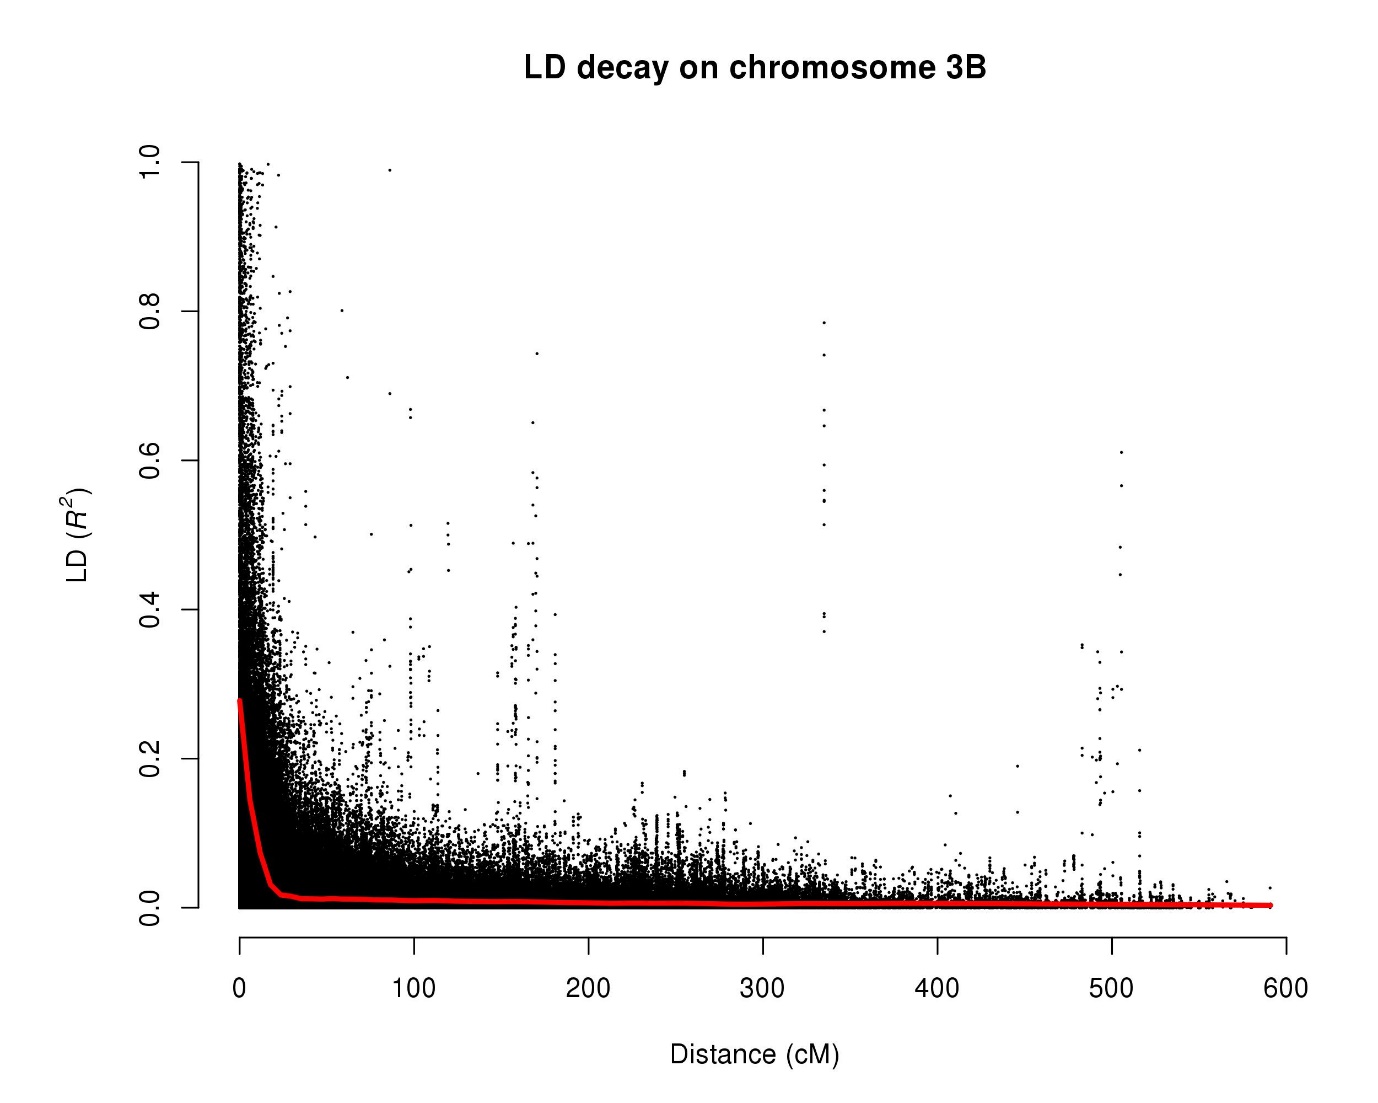


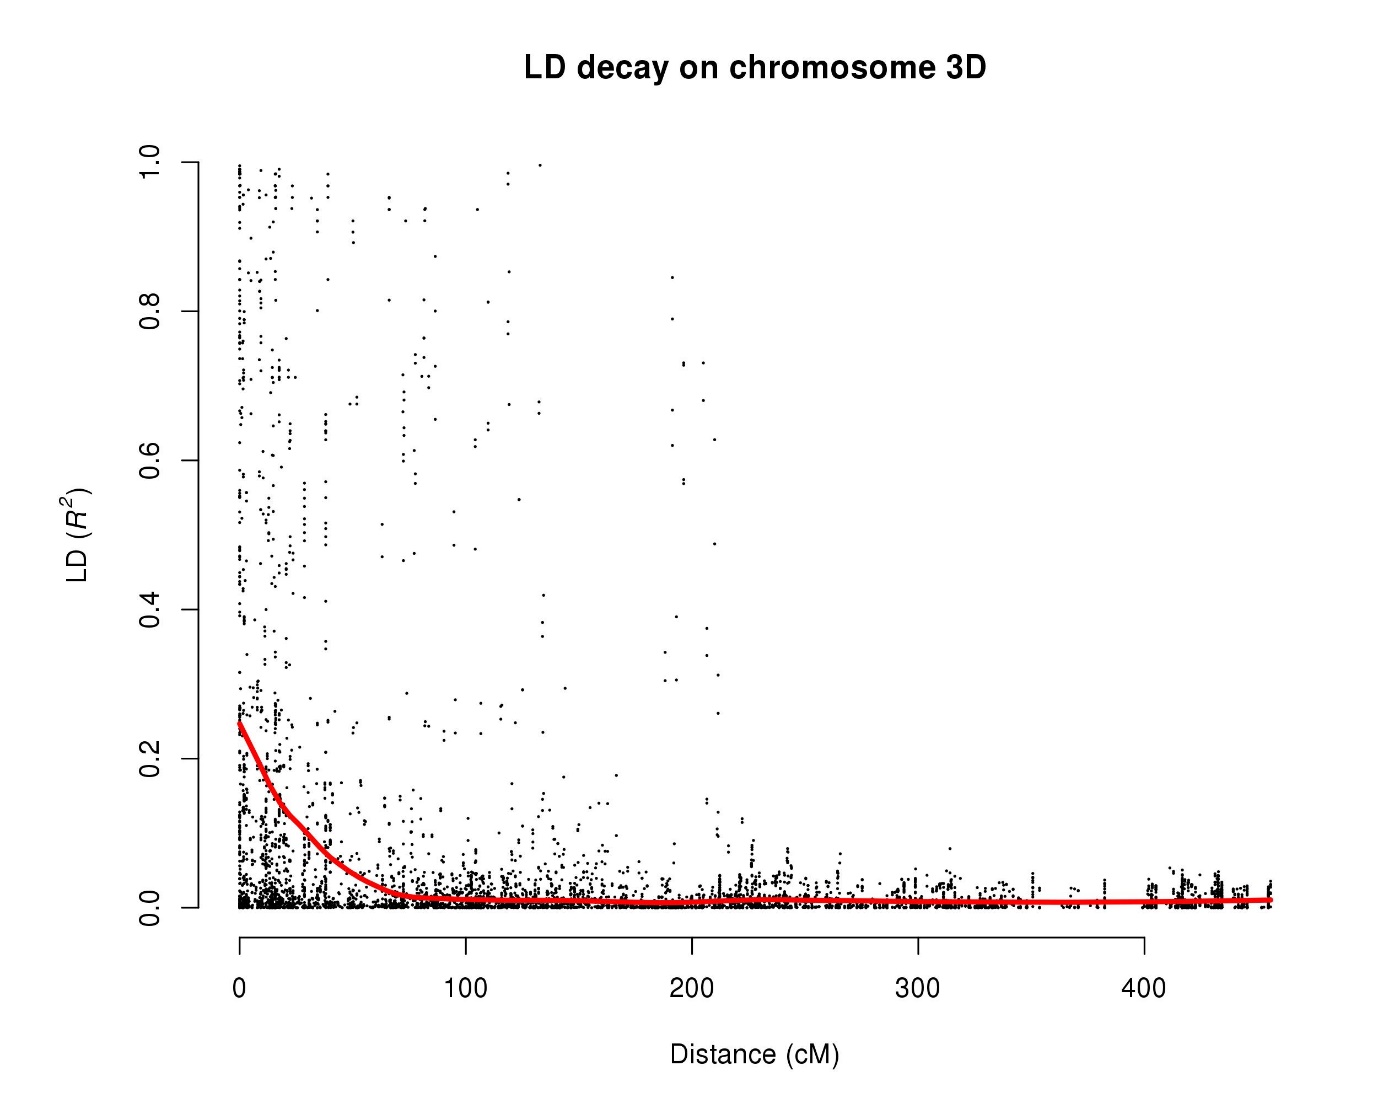


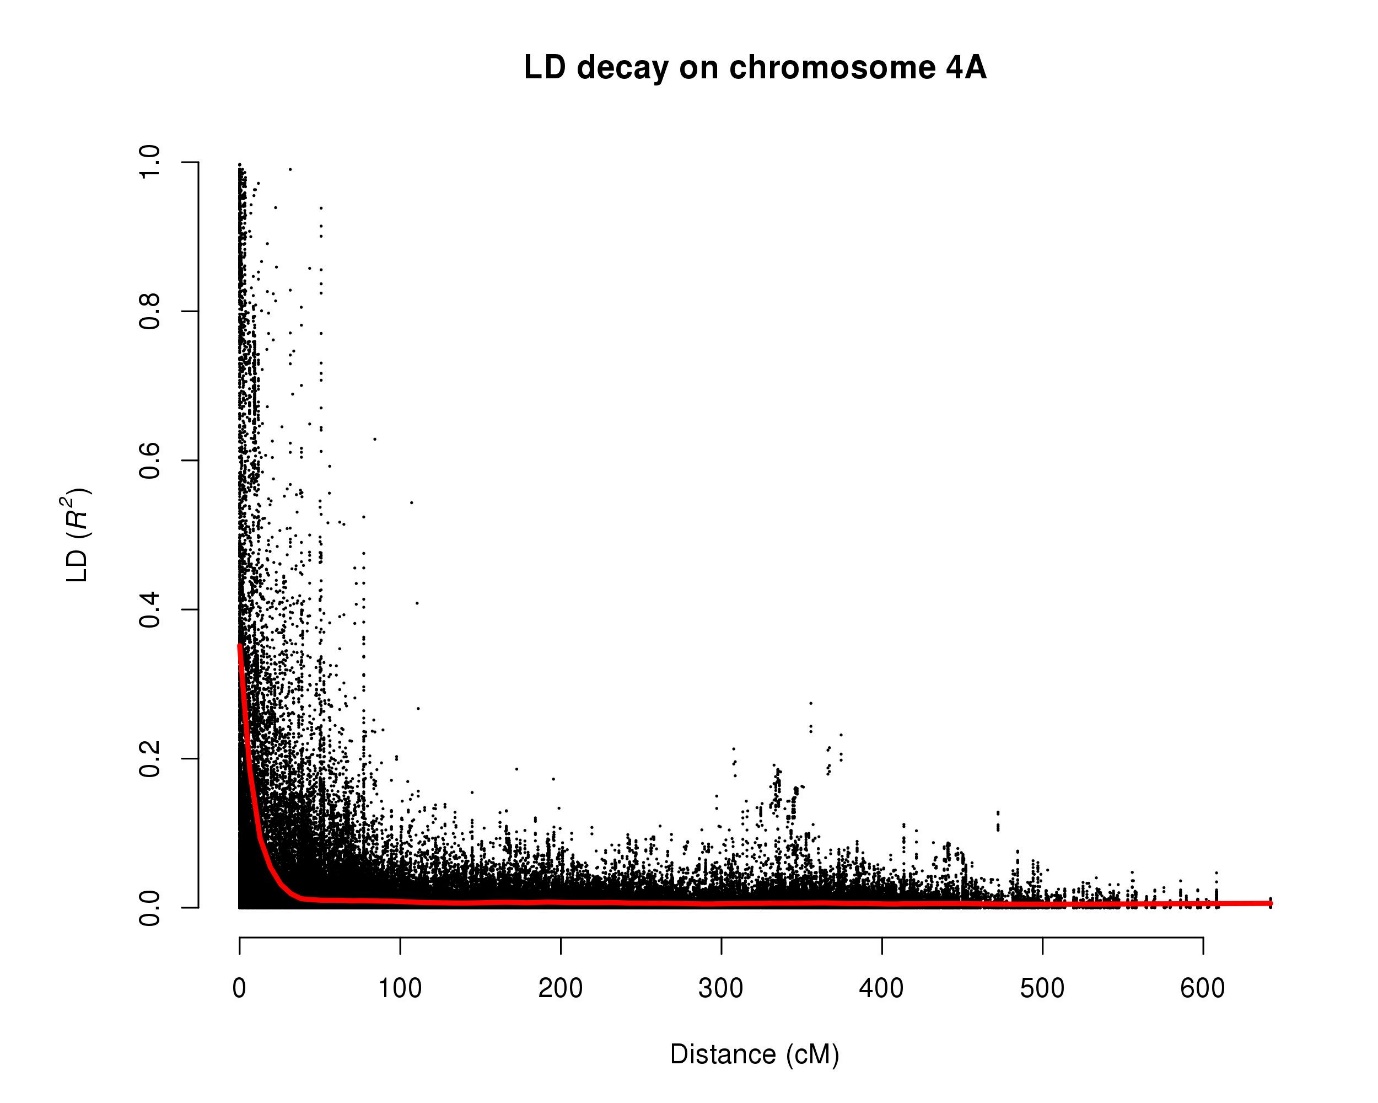


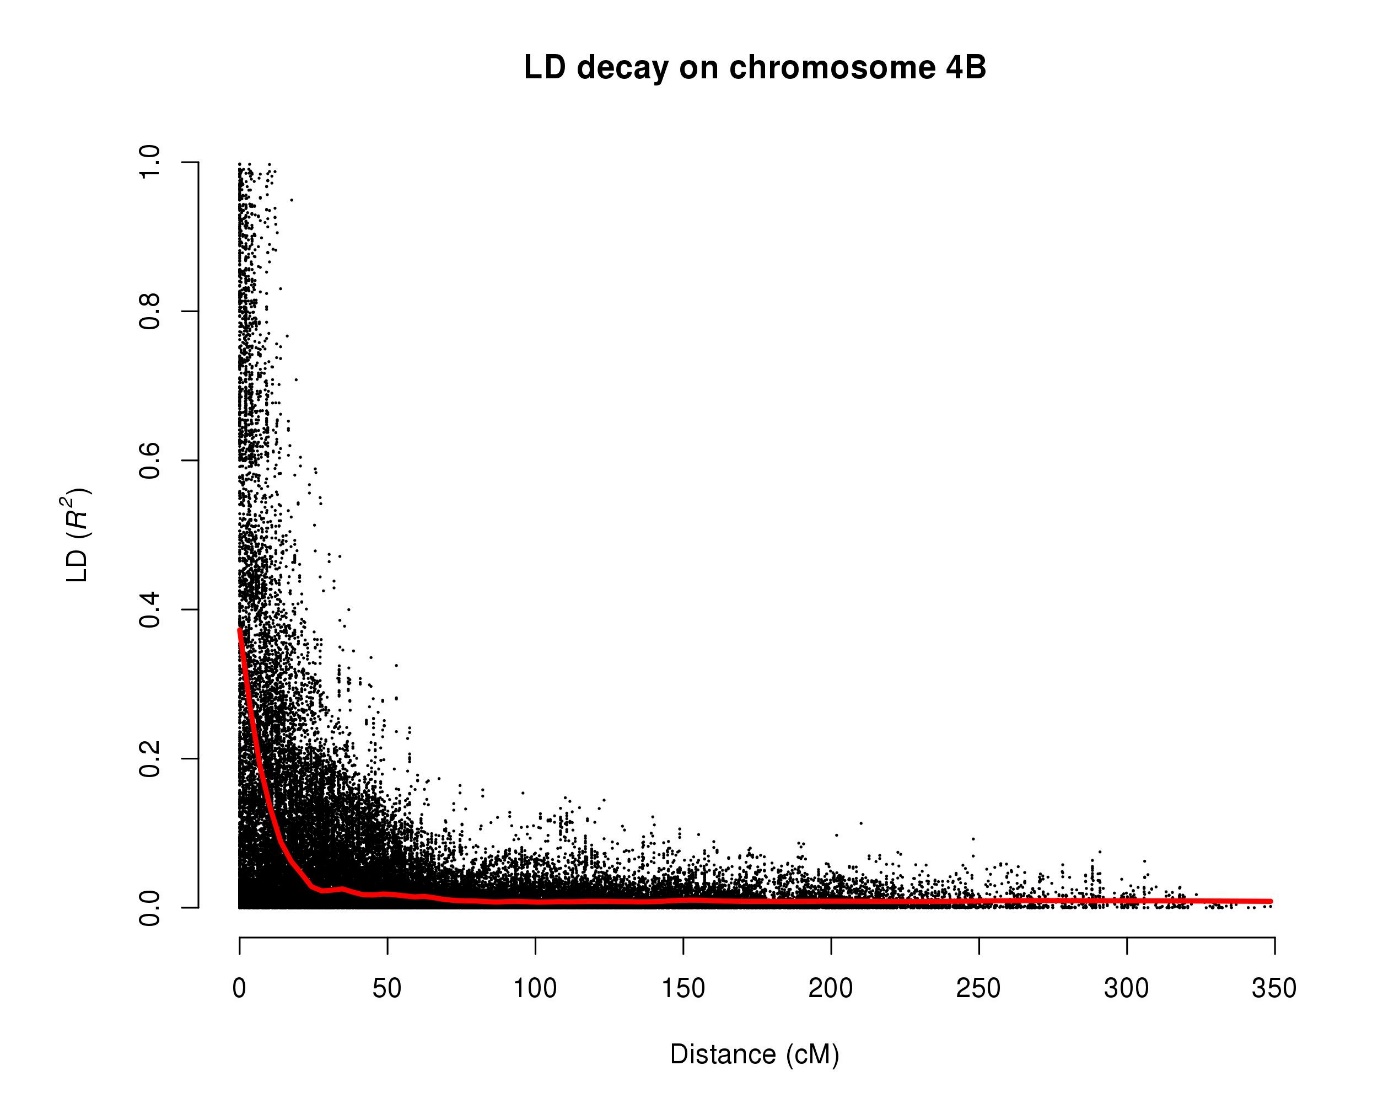


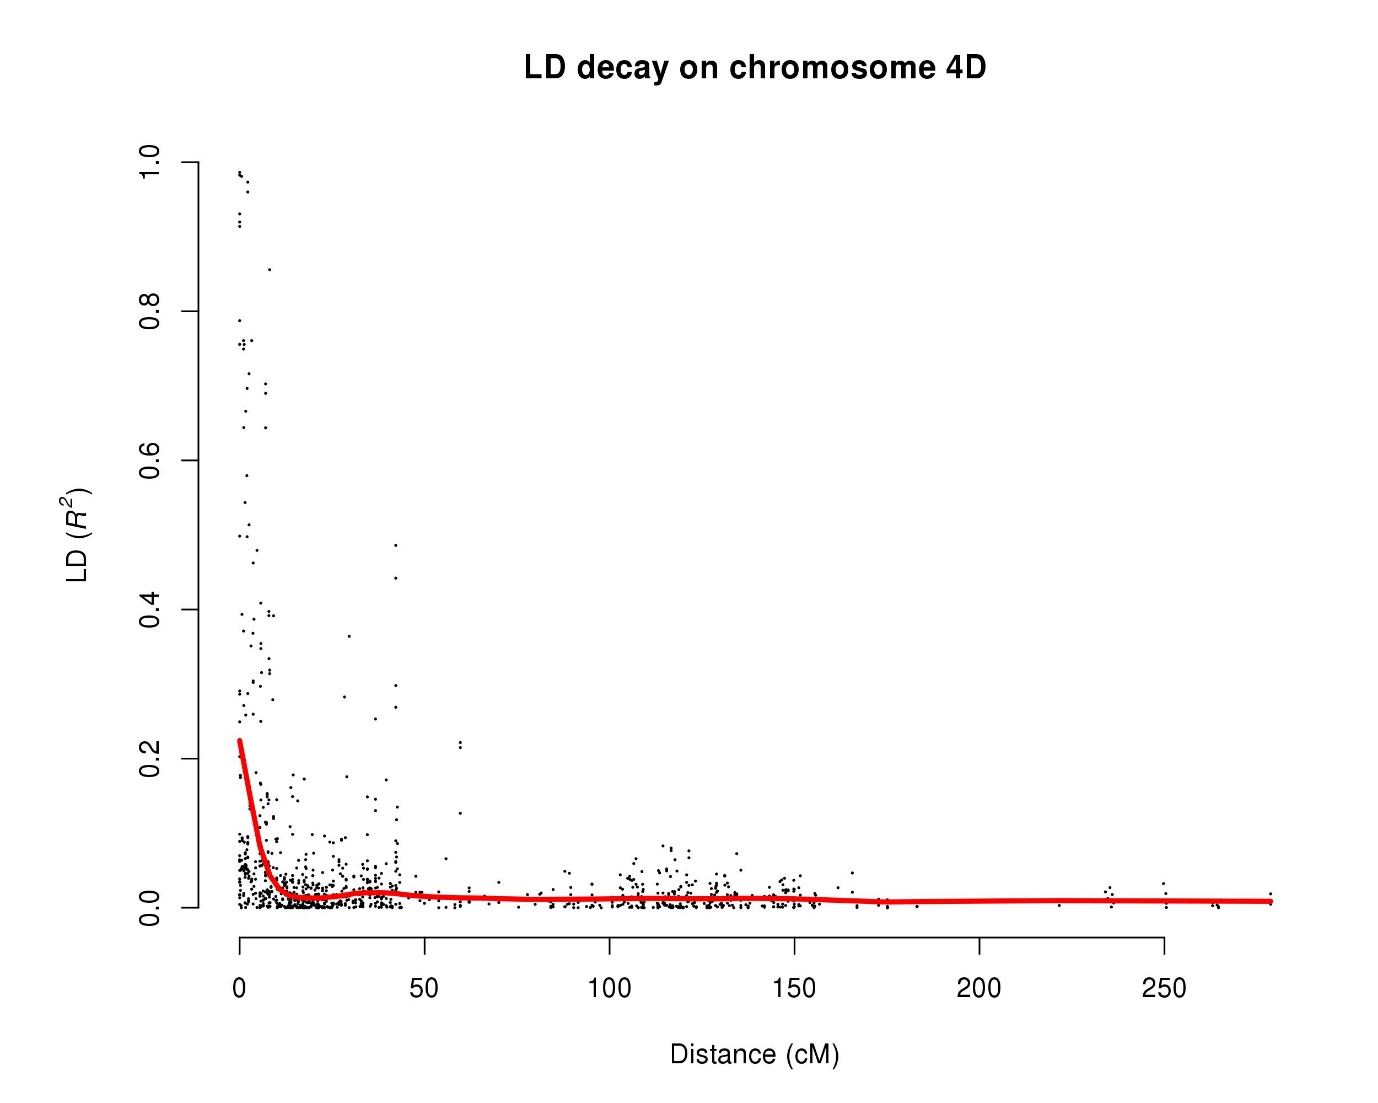


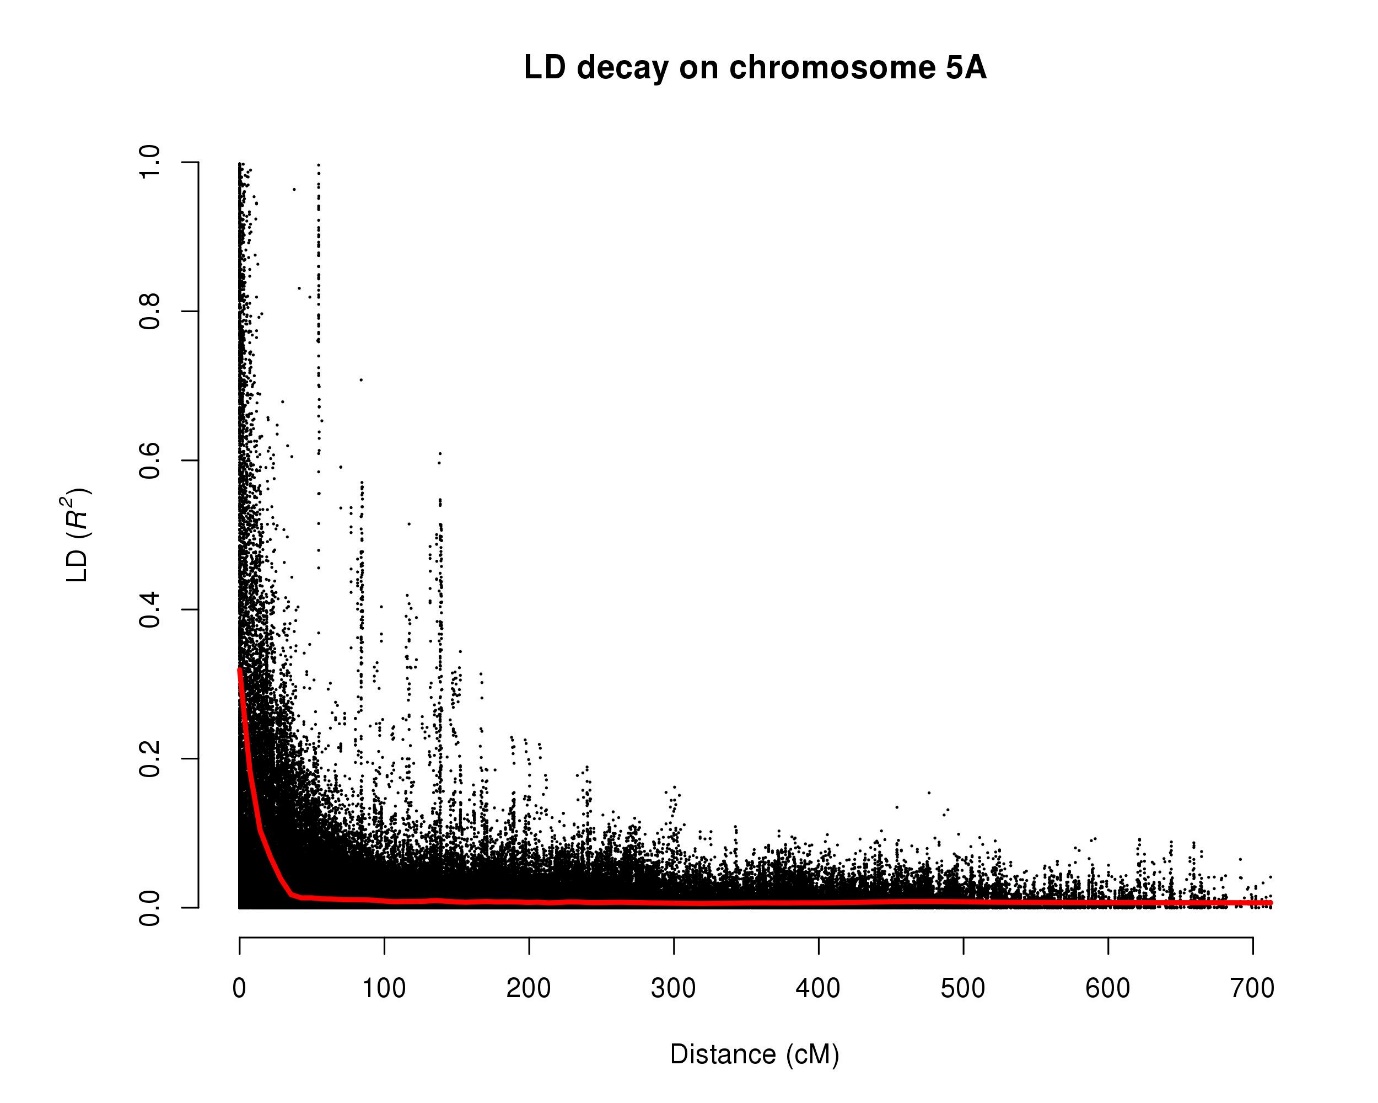


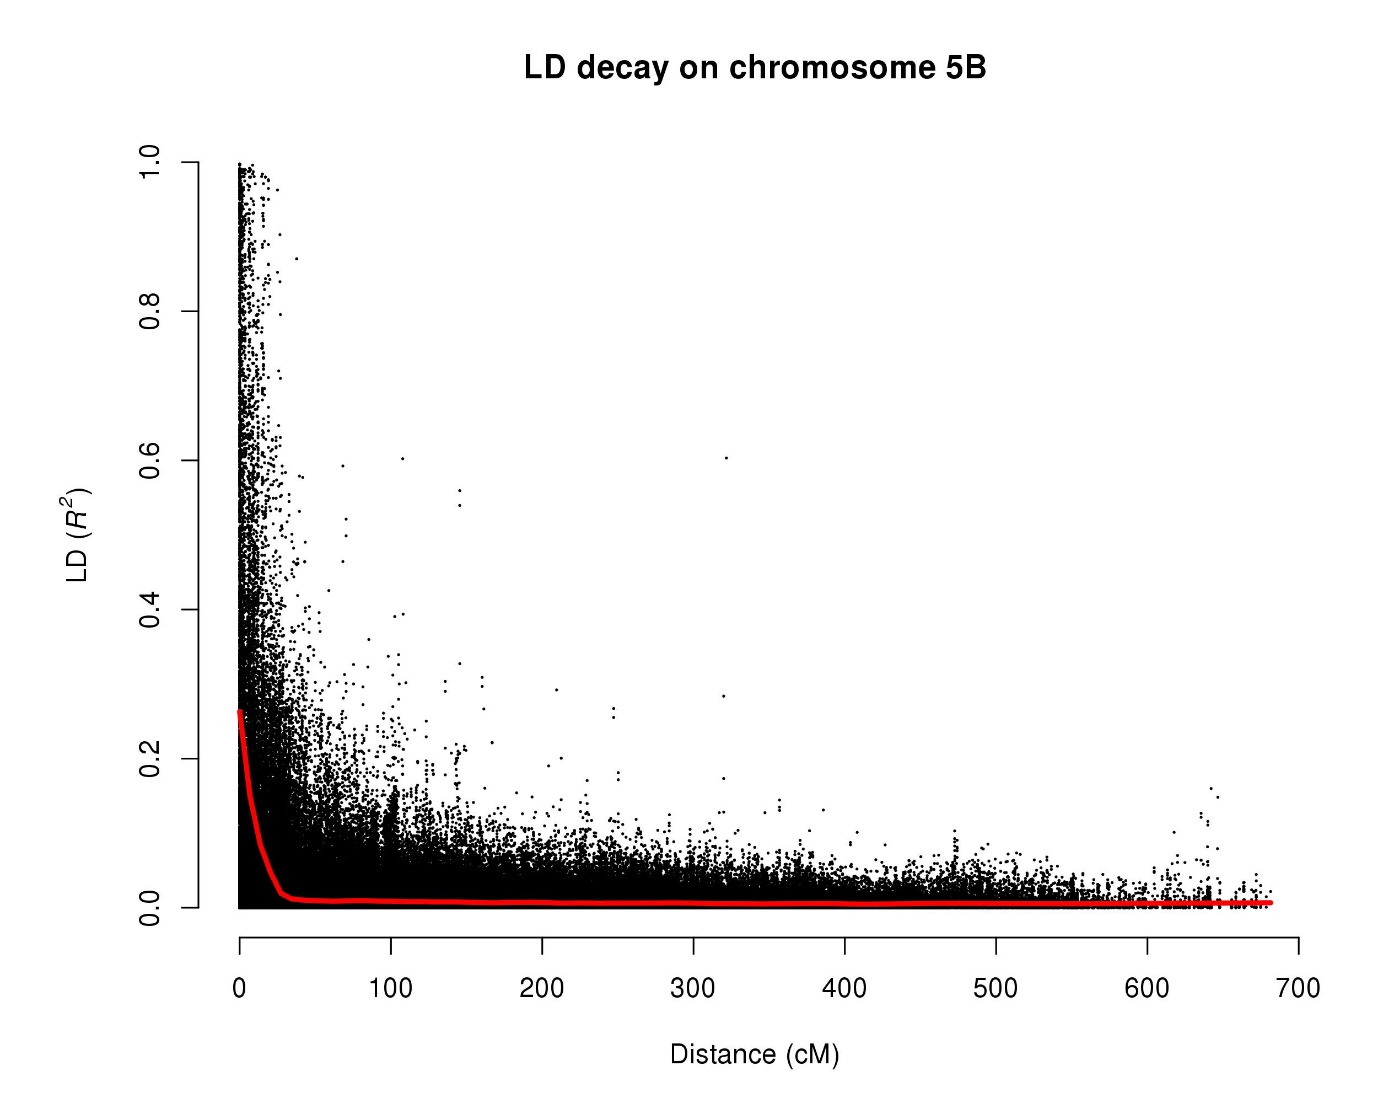


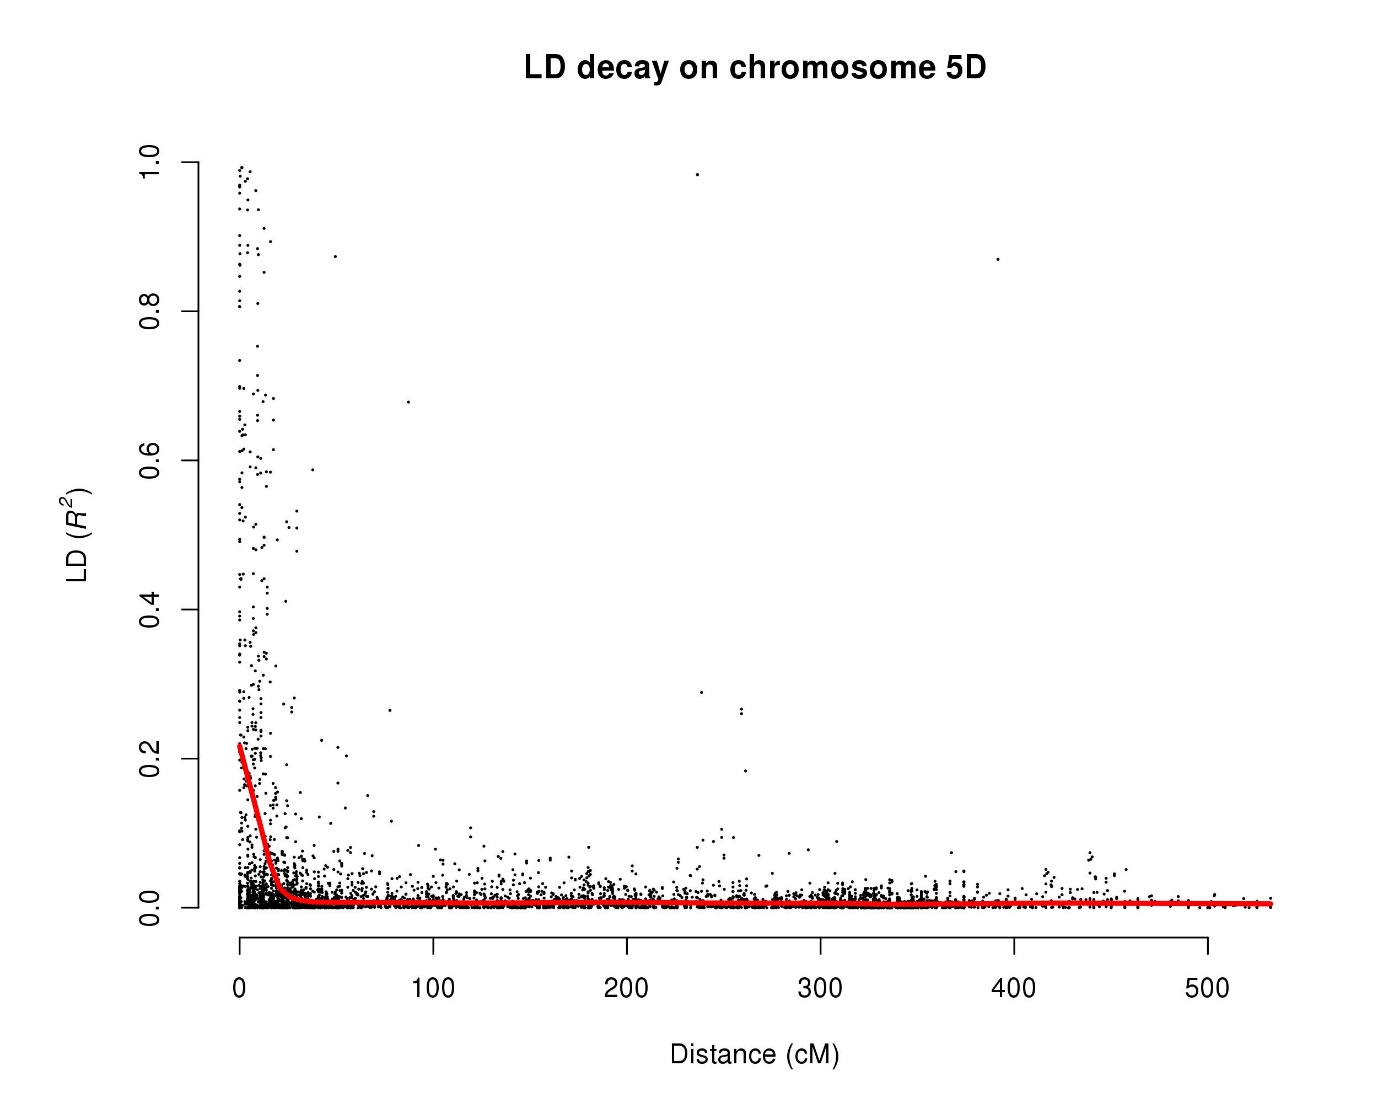


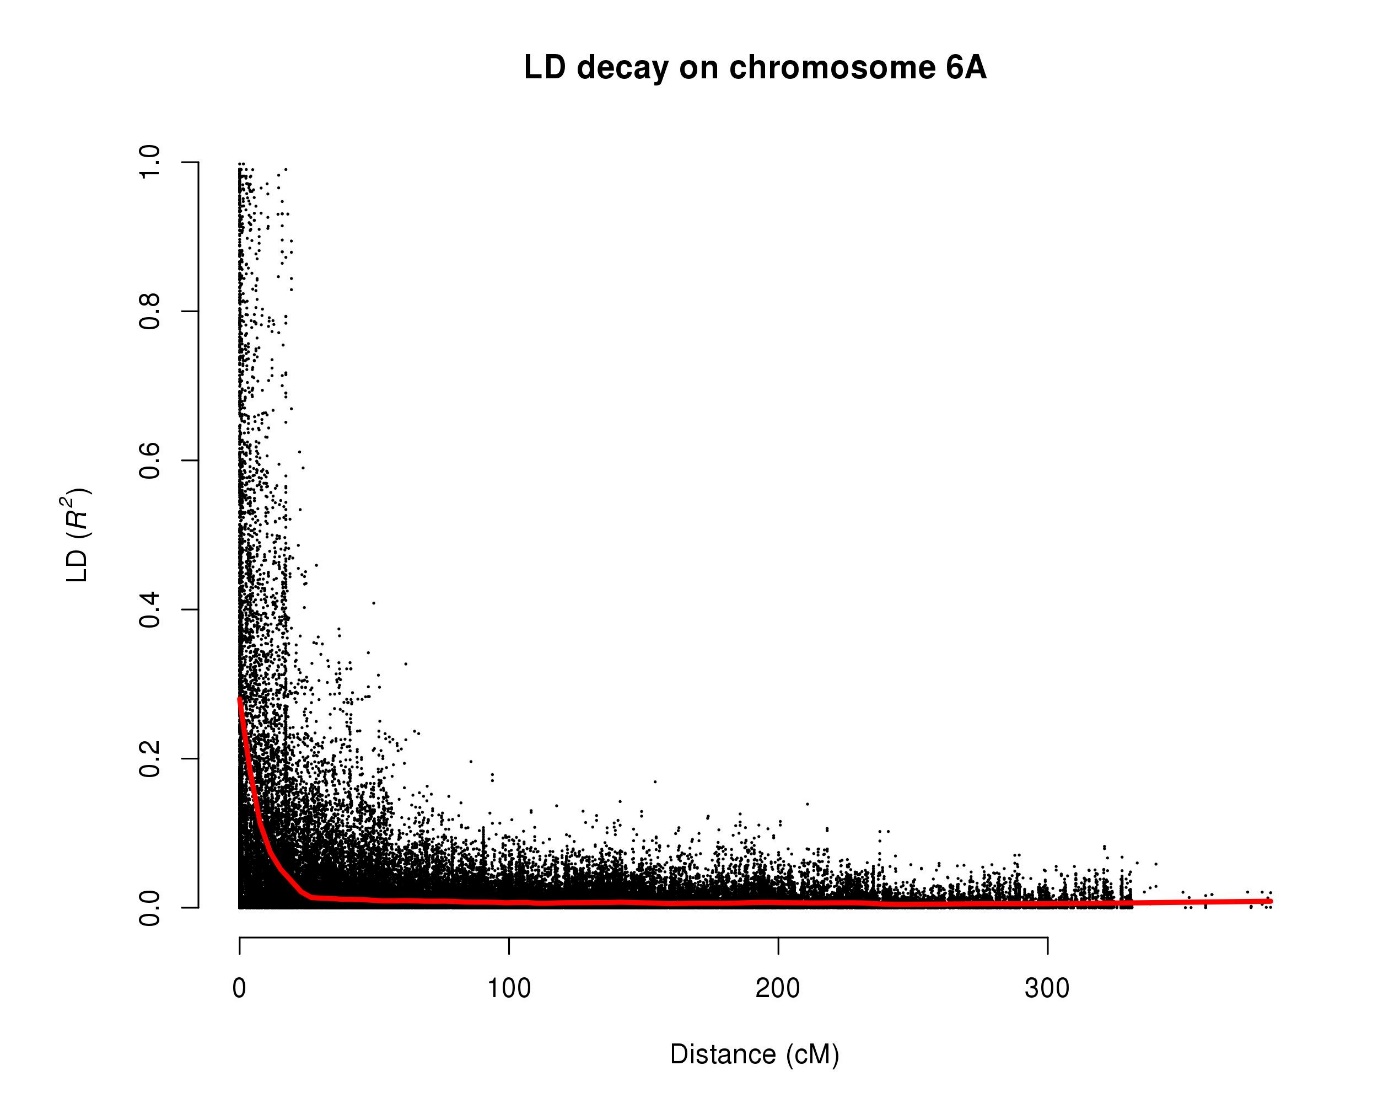


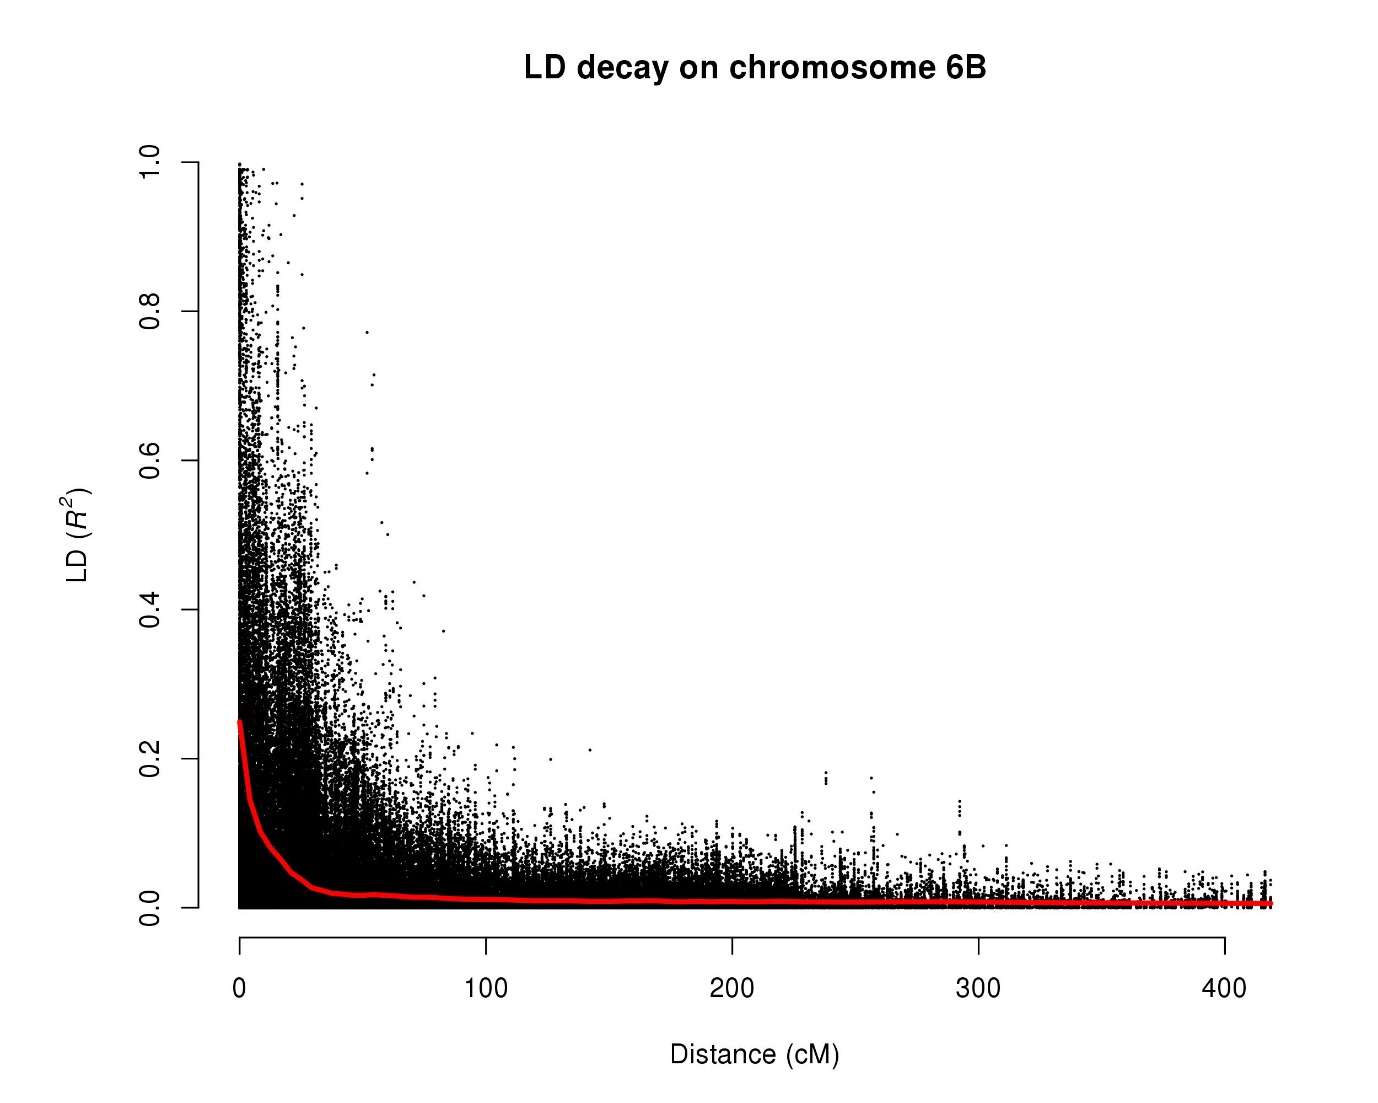


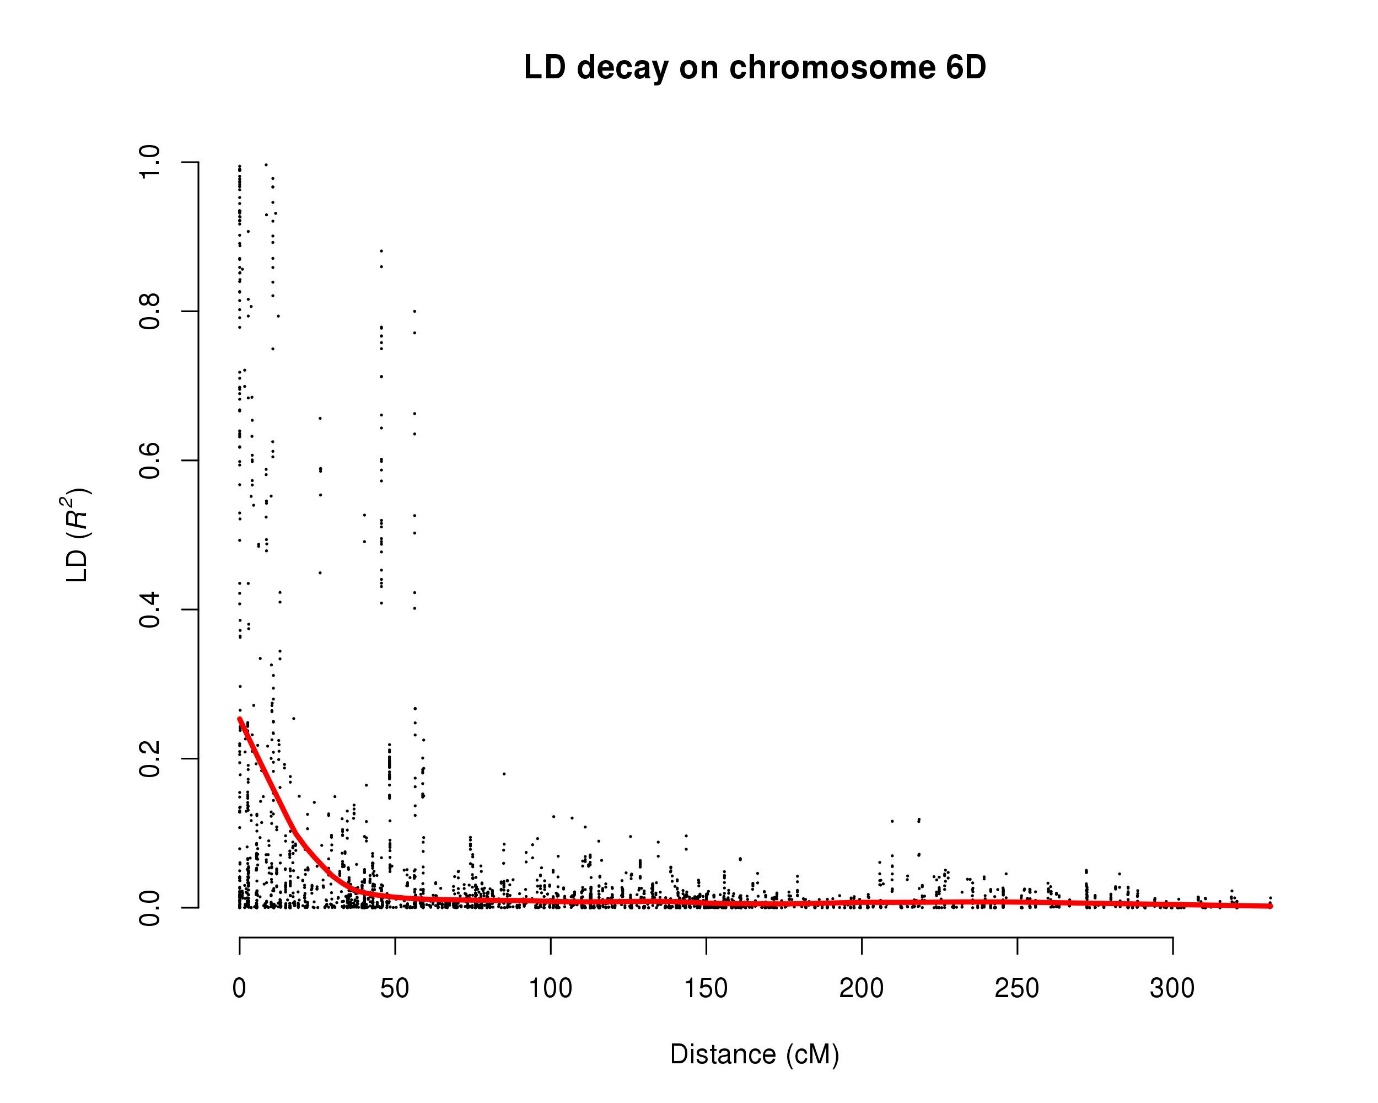


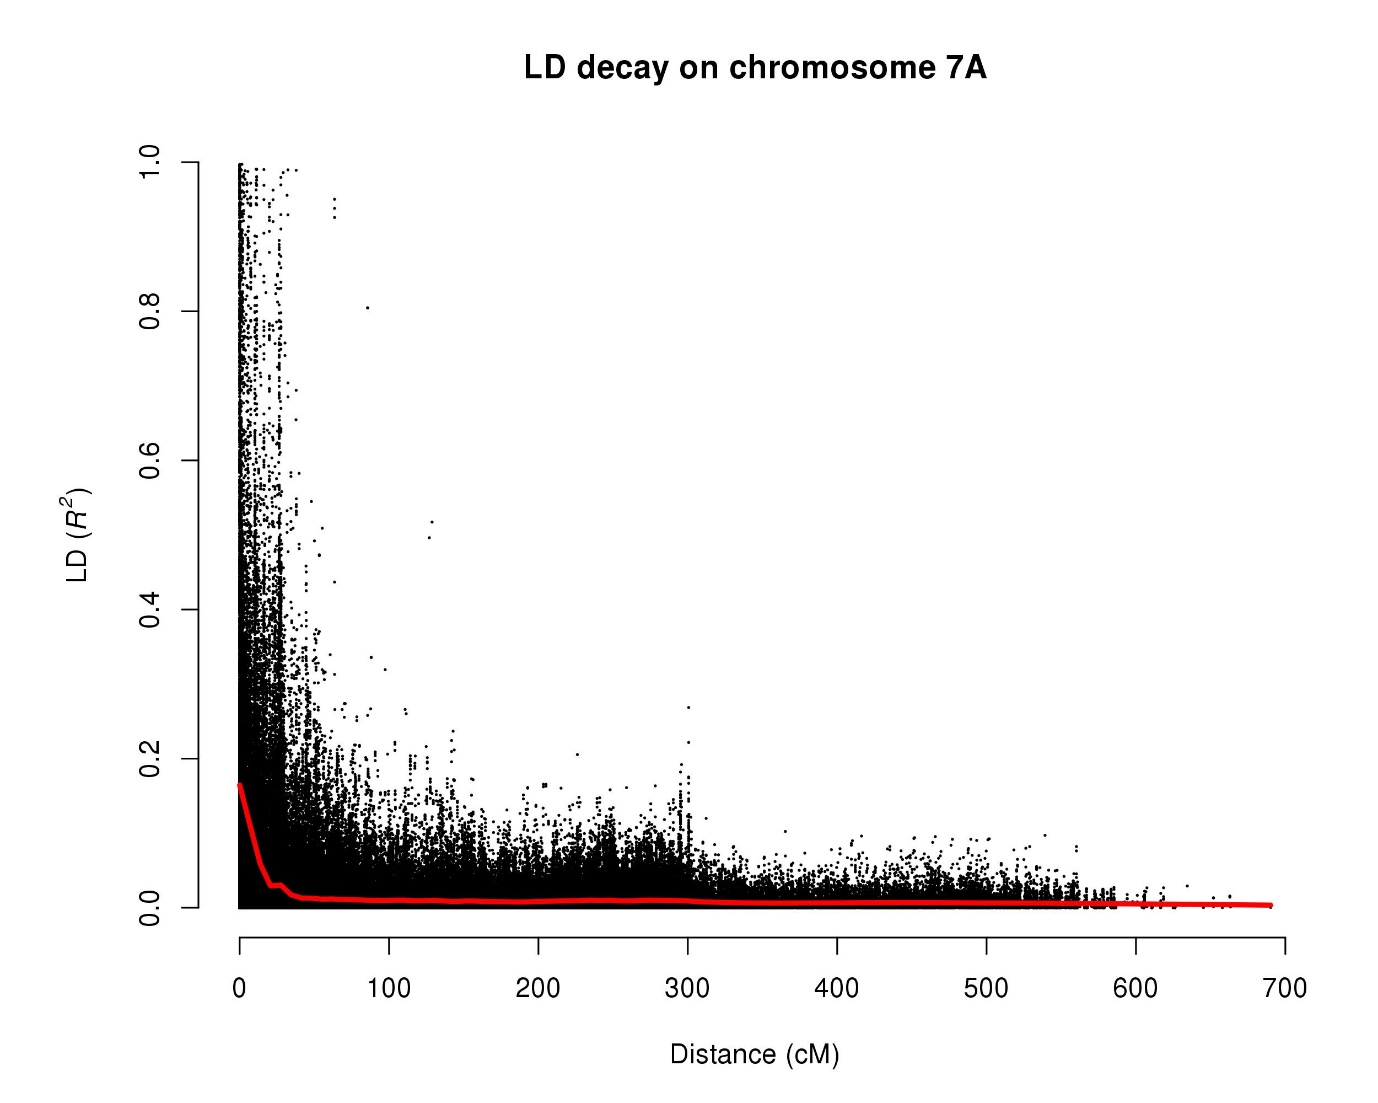


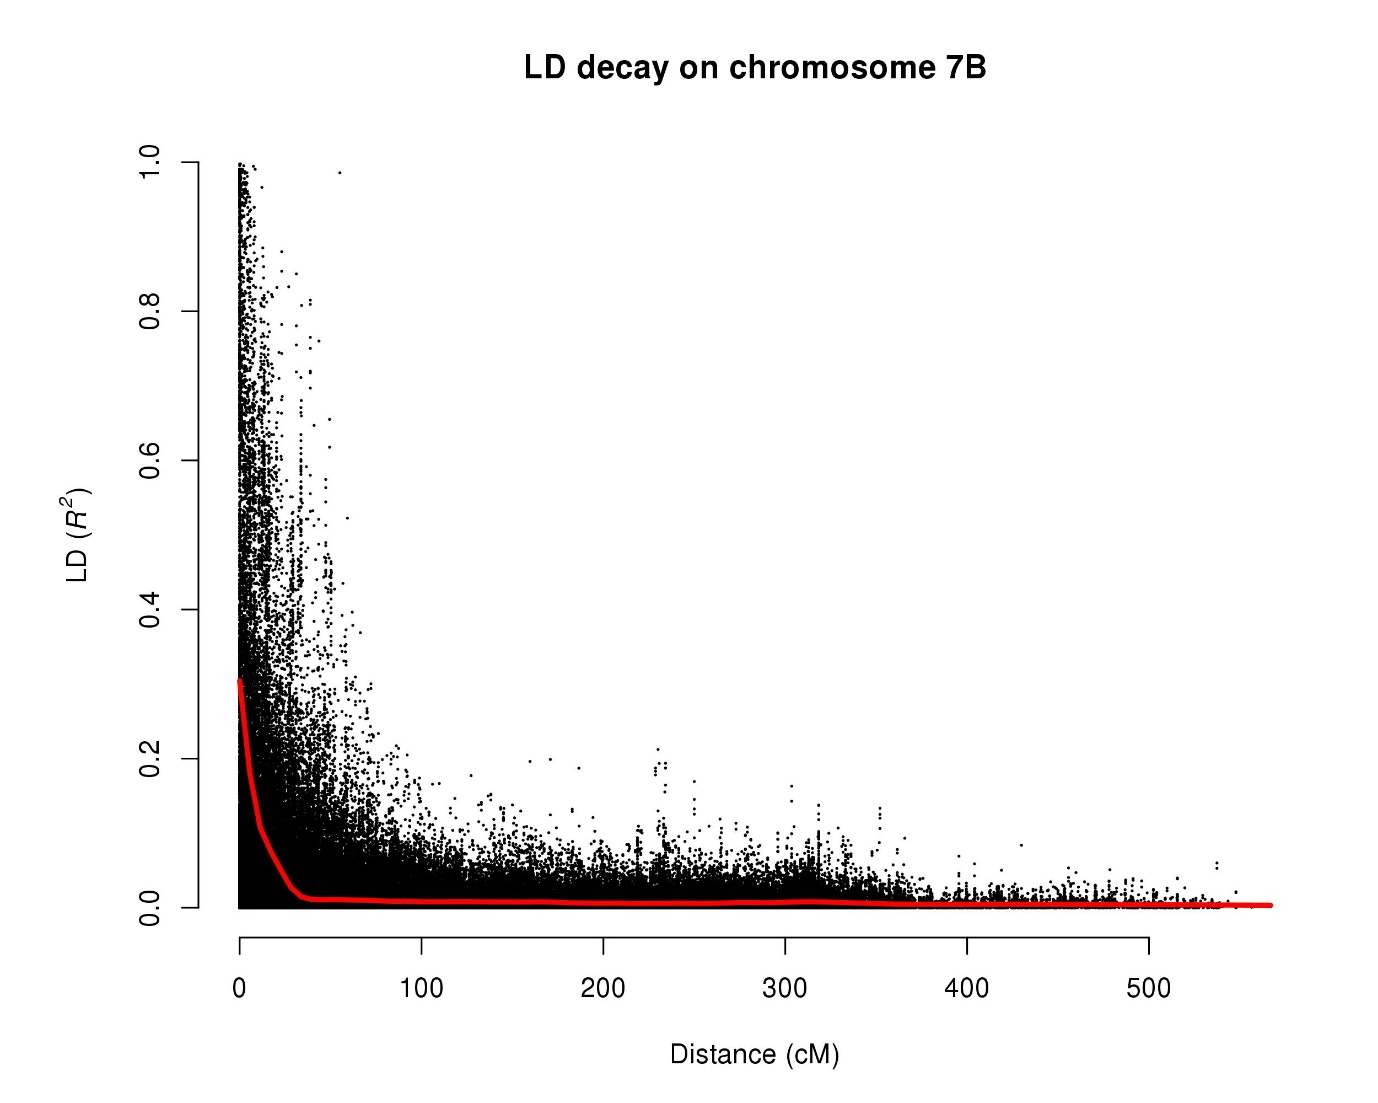


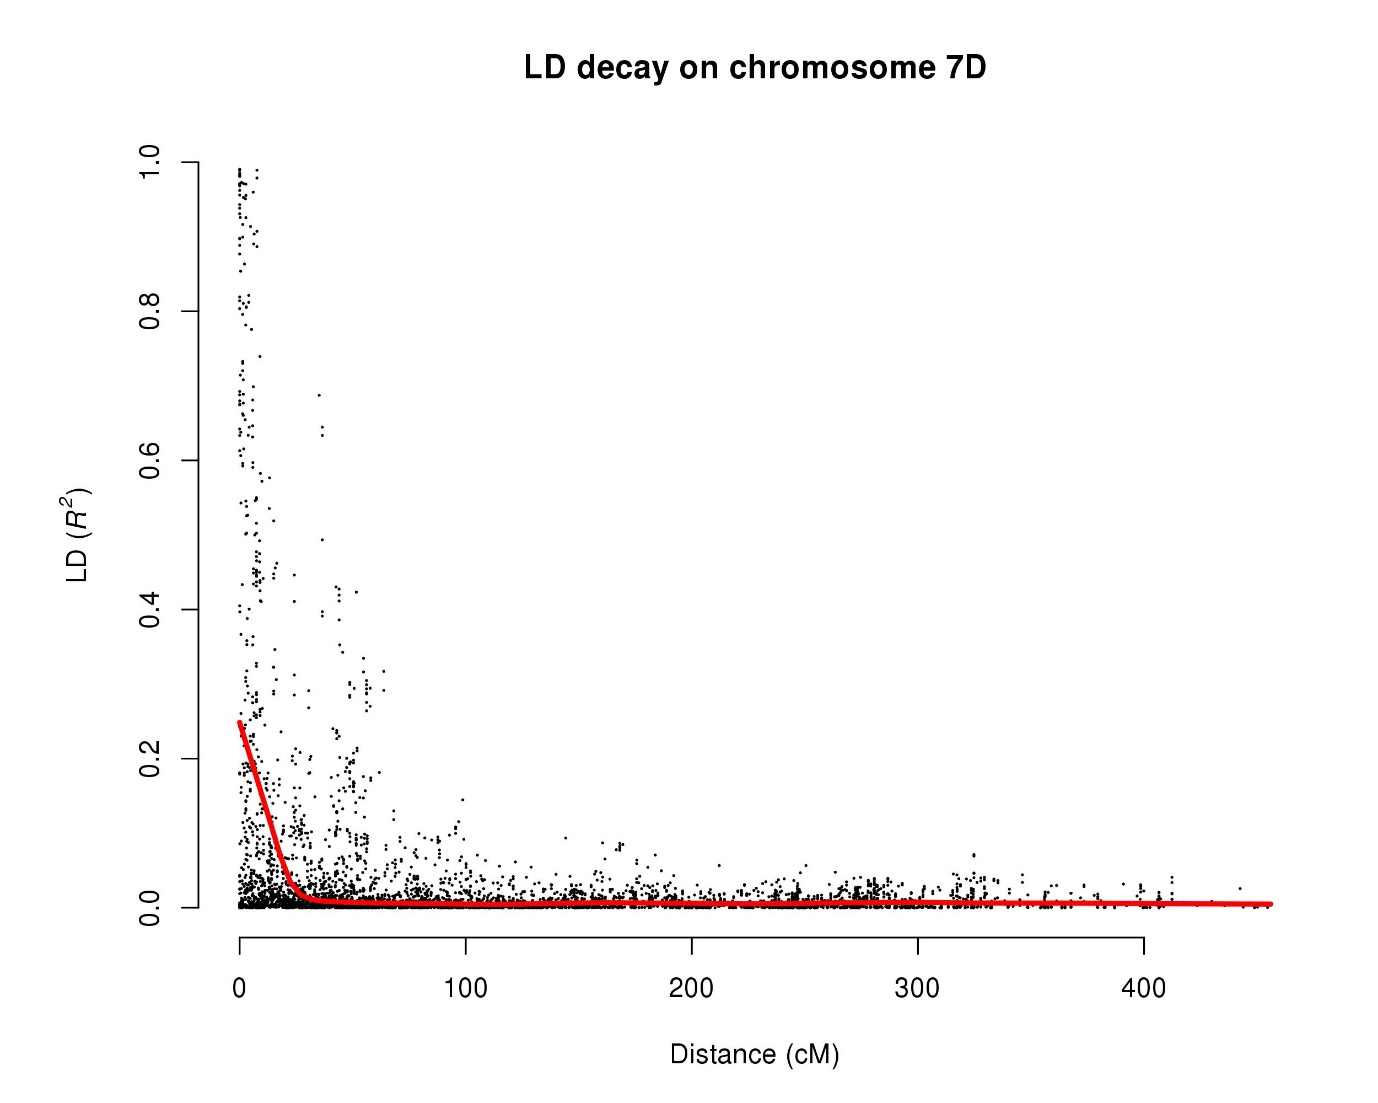


**Supplementary Figure 3.** Intra-chromosomal linkage disequilibrium (LD) in the association mapping panel, as measured chromosome-by-chromosome by *r2* between genetically mapped marker pairs. A LOWESS curve is fitted to the data, indicated in red.
